# Supplementary material for: People with Easier to Pronounce Names Promote Truthiness of Claims
Source: PLoS One. 2014 Feb 26;9(2):e88671. doi: 10.1371/journal.pone.0088671 (PMC3935838; doi:10.1371/journal.pone.0088671)
Supplement: Dataset S2 — Risk ratings data. Raw data for Experiment 1b. (XLSX) [file pone.0088671.s002.xlsx]

## Sheet: Sheet1
Order of names	Subject	Amira El-Naggar	Andrian Babeshko	Bandula Premachandra	Bodo Wallmeyer	Chen Meina	Chung Jung-hee	Czeslaw Ratynska	Hur Hye-seong	Lubov Ershova	Mahbobeh Mir-Ma’soum	Marciano Larrosa	Maribel Alconero	Putali Angami	Shagnik Ravunniarath	Shobha Bhattacharya	Svea Gelowicz	Yevgeny Dherzhinsky	Yu Zhenglong	Nationality	Languages	PSYC322 class?	Overall Easy Names rating	Overall Difficult Names rating		Key: Column name	Key: Explanation of column contents
1	sn1 IPRP	2	2	2	2	2	2	2	2	2	2	2	2	2	2	2	2	2	2	NZ European	Japanese, Latin	N	2	2		Order of names	The order in which names appeared for rating; names were presented in 1 of 10 fixed random orders
2	sn2 IPRP	3	4	2	4	1	1	3	2	2	2	4	3	4	4	1	3	2	2	NZ European	Spanish	N	2.77778	2.44444		Subject	sn = Subject Number; IPRP = data collected in lab; campus = data were collected out on campus; IPRP 2 = data collected in lab after other, unrelated experiment
3	sn3 IPRP	2	3	3	2	3	3	4	2	4	4	2	2	3	4	3	4	4	2	NZ	French	N	2.77778	3.22222		Amira El-Naggar	Risk rating from 1 = very safe to 5 = very risky for this Easy to pronounce name from Middle East
4	sn4 IPRP	2	2	2	2	2	4	3	4	4	4	2	2	2	3	4	4	4	2	NZ European/Maori	Spanish, Japanese	N	2.44444	3.33333		Andrian Babeshko	Risk rating from 1 = very safe to 5 = very risky for this Easy to pronounce name from East Europe
5	sn5 IPRP	3	2	2	1	2	2	2	2	3	2	2	1	2	3	3	2	3	2	NZ	NZ sign language	N	2.11111	2.22222		Bandula Premachandra	Risk rating from 1 = very safe to 5 = very risky for this Easy to pronounce name from South Asia
6	sn6 IPRP	1	1	2	2	2	2	3	2	2	3	1	1	3	3	2	3	1	3	NZ	Bulgarian, Spanish	N	1.77778	2.33333		Bodo Wallmeyer	Risk rating from 1 = very safe to 5 = very risky for this Easy to pronounce name from West Europe
7	sn7 IPRP	1	2	3	4	2	4	4	4	2	4	2	4	2	3	3	2	3	4	NZ	Spanish, French	N	2.44444	3.44444		Chen Meina	Risk rating from 1 = very safe to 5 = very risky for this Easy to pronounce name from East Asia
8	sn8 IPRP	1	3	1	2	3	2	3	2	4	3	1	2	3	4	3	2	4	2	NZ European	French	N	2.22222	2.77778		Chung Jung-hee	Risk rating from 1 = very safe to 5 = very risky for this Easy to pronounce name from East Asia
1	sn9 campus	3	2	5	1	2	2	4	3	4	4	5	4	3	3	4	3	4	2	NZ European	No	N	3	3.44444		Czeslaw Ratynska	Risk rating from 1 = very safe to 5 = very risky for this Difficult to pronounce name from East Europe
1	sn10 campus	3	4	1	5	2	2	3	3	3	3	3	5	2	2	2	4	2	3	NZ	Finnish	N	2.77778	3		Hur Hye-seong	Risk rating from 1 = very safe to 5 = very risky for this Difficult to pronounce name from East Asia
2	sn11 campus	2	3	3	4	2	1	3	2	1	3	4	1	2	4	2	4	2	2	NZ European	Korean	N	2.44444	2.55556		Lubov Ershova	Risk rating from 1 = very safe to 5 = very risky for this Easy to pronounce name from East Europe
3	sn12 campus	3	3	3	3	3	3	3	3	3	3	3	3	3	3	3	3	3	3	NZ European	Japanese	N	3	3		Mahbobeh Mir-Ma’soum	Risk rating from 1 = very safe to 5 = very risky for this Difficult to pronounce name from Middle East
4	sn13 campus	1	3	5	4	4	5	4	3	2	2	4	2	3	1	3	3	5	2	NZ	German, Italian	N	3.44444	2.77778		Marciano Larrosa	Risk rating from 1 = very safe to 5 = very risky for this Easy to pronounce name from West Europe
5	sn14 campus	2	1	5	4	1	3	3	2	2	1	1	1	1	2	3	2	4	2	NZ	Japanese, Spanish	N	2.22222	2.22222		Maribel Alconero	Risk rating from 1 = very safe to 5 = very risky for this Difficult to pronounce name from West Europe
6	sn15 campus	3	3	2	3	3	4	3	3	3	1	2	3	2	2	3	3	2	3	NZ European	No	N	2.77778	2.55556		Putali Angami	Risk rating from 1 = very safe to 5 = very risky for this Easy to pronounce name from South Asia
7	sn16 campus	4	3	3	3	2	3	4		3	4	3	4	2	4	3	3	2	3	NZ European	French	N	2.88889	3.375		Shagnik Ravunniarath	Risk rating from 1 = very safe to 5 = very risky for this Difficult to pronounce name from South Asia
8	sn17 campus	4	3	3	2	2	3	3	3	3	4	2	1	2	2	3	3	2	3	NZ	German	N	2.66667	2.66667		Shobha Bhattacharya	Risk rating from 1 = very safe to 5 = very risky for this Difficult to pronounce name from South Asia
9	sn18 campus	1	2	1	3	1	4	4	3	1	3	2	1	3	3	2	3	4	2	Pakeha	French	N	2	2.77778		Svea Gelowicz	Risk rating from 1 = very safe to 5 = very risky for this Difficult to pronounce name from West Europe
9	sn19 campus	3	2	3	2	2	2	2	2	2	2	2	2	3	3	3	2	2	2	NZ European	German	N	2.33333	2.22222		Yevgeny Dherzhinsky	Risk rating from 1 = very safe to 5 = very risky for this Difficult to pronounce name from East Europe
10	sn20 campus	1	1	2	3	2	2	4	2	3	3	1	1	2	1	3	3	4	2	NZ European	No	N	1.88889	2.55556		Yu Zhenglong	Risk rating from 1 = very safe to 5 = very risky for this Difficult to pronounce name from East Asia
10	sn21 campus	3	3	3	3	3	3	3	3	3	3	3	3	3	3	3	3	3	3	NZ	No	N	3	3		Nationality	Nationality of the subject; NZ = New Zealander, Pakeha = New Zealand European
1	sn22 IPRP 2	1	1	2	3	2	5	4	4	2	4	4	5	3	2	4	2	3	1	Maori/European	No	N	2.55556	3.22222		Languages	Languages the subject knows, other than English; No = only knows English
2	sn23 IPRP 2	4	3	3	3	2	3	3	3	4	4	3	4	4	3	3	3	4	3	NZ European	Danish	N	3.22222	3.33333		PSYC322 class?	Had the subject had taken Maryanne Garry's class on Memory? Y = yes, N = no
3	sn24 IPRP 2	2	3	2	4	2	3	3	3	3	3	1	1	3	3	4	3	4	3	NZ European	Latin, French	N	2.55556	3		Overall Easy Names rating	Mean risk rating across all easy to pronounce names
5	sn25 IPRP 2	5	3	5	3	2	4	4	2	5	5	4	2	3	5	5	1	4	1	New Zealand European	Japanese	N	3.77778	3.22222		Overall Difficult Names rating	Mean risk rating across all difficult to pronounce names
6	sn26 IPRP 2	2	1	2	2	3	3	4	3	3	2	1	1	3	5	4	2	5	4	New Zealand European	German, Maori	N	2.22222	3.33333
7	sn27 IPRP 2	3	3	2	3	3	3	3	2	4	4	4	2	3	3	3	3	3	3	NZ	Japanese, French, Arabic, Finnish, Sinhala	N	3.11111	2.88889			NB: denominators in mean rating calculations were adjusted accordingly for subjects that did not rate every name
8	sn28 IPRP 2	3	3	3	2	2	2	4	2	3	2	4	4	3	4	4	4	4	1	NZ/Maori	Maori, French	N	2.77778	3.22222
