# Supplementary material for: People with Easier to Pronounce Names Promote Truthiness of Claims
Source: PLoS One. 2014 Feb 26;9(2):e88671. doi: 10.1371/journal.pone.0088671 (PMC3935838; doi:10.1371/journal.pone.0088671)
Supplement: Dataset S4 — Trivia judgments data. Raw data for Experiment 2. (XLSX) [file pone.0088671.s004.xlsx]

## Sheet: Sheet1
CB	Subject	D1 Shagnik Ravunniarath	D1 Czeslaw Ratynska	D1 Maribel Alconero	D1 Yevgeny Dherzhinsky	D2 Hur Hye-seong	D2 Svea Gelowicz	D2 Shobha Bhattacharya	D2 Yu Zhenglong	E1 Putali Angami	E1 Lubov Ershova	E1 Bodo Wallmeyer	E1 Marciano Larrosa	E2 Chung Jung-hee	E2 Andrian Babeshko	E2 Bandula Premachandra	E2 Chen Meina	Easy name hits	Easy name false alarms	Difficult name hits	Difficult name false alarms	Overall hits	Overall false alarms	Overall easy names	Overall difficult names		Key: Column name	Key: Explanation of column contents
1	1	l	l	l	a	l	a	a	l	a	a	a	a	l	l	l	l	1	0	0.25	0.5	0.625	0.25	0.5	0.375		CB	Counterbalance to which subject was allocated (denotes which names were paired with which trivia statements; see below for more detail)
2	2	a	a	l	l	l	a	l	l	a	l	a	a	a	a	l	a	0.75	0.75	0.25	0.5	0.5	0.625	0.75	0.375		Subject	Subject number
3	3	a	l	a	a	a	l	a	a	l	a	a	a	a	l	a	l	0.5	0.75	0.75	0.75	0.625	0.75	0.625	0.75		D1 Shagnik Ravunniarath	a = true, l = false; Judgement of statement paired with this Difficult to pronounce name from South Asia in Block D1
4	4	a	a	l	l	l	l	a	l	a	l	a	a	l	l	a	l	0.75	0.25	0.5	0.25	0.625	0.25	0.5	0.375		D1 Czeslaw Ratynska	a = true, l = false; Judgement of statement paired with this Difficult to pronounce name from East Europe in Block D1
2	5	l	l	a	l	l	a	l	l	l	l	l	a	a	a	l	a	0.75	0.25	0.25	0.25	0.5	0.25	0.5	0.25		D1 Maribel Alconero	a = true, l = false; Judgement of statement paired with this Difficult to pronounce name from West Europe in Block D1
3	6	a	l	l	l	a	a	a	a	l	a	l	a	a	a	a	a	1	0.5	1	0.25	1	0.375	0.75	0.625		D1 Yevgeny Dherzhinsky	a = true, l = false; Judgement of statement paired with this Difficult to pronounce name from East Europe in Block D1
4	7	a	a	l	a	l	l	l	a	a	l	l	l	a	l	a	l	0.25	0.5	0.75	0.25	0.5	0.375	0.375	0.5		D2 Hur Hye-seong	a = true, l = false; Judgement of statement paired with this Difficult to pronounce name from East Asia in Block D2
1	8	l	a	l	l	a	a	a	l	a	a	l	l	l	a	l	a	0.5	0.5	0.25	0.75	0.375	0.625	0.5	0.5		D2 Svea Gelowicz	a = true, l = false; Judgement of statement paired with this Difficult to pronounce name from West Europe in Block D2
2	9	a	a	a	a	a	a	a	a	l	l	a	l	a	l	a	a	0.75	0.25	1	1	0.875	0.625	0.5	1		D2 Shobha Bhattacharya	a = true, l = false; Judgement of statement paired with this Difficult to pronounce name from South Asia in Block D2
3	10	l	l	a	l	a	l	a	a	a	l	l	a	a	a	l	a	0.75	0.5	0.75	0.25	0.75	0.375	0.625	0.5		D2 Yu Zhenglong	a = true, l = false; Judgement of statement paired with this Difficult to pronounce name from East Asia in Block D2
4	11	a	a	a	l	a	l	l	l	l	l	a	a	a	l	l	a	0.5	0.5	0.75	0.25	0.625	0.375	0.5	0.5		E1 Putali Angami	a = true, l = false; Judgement of statement paired with this Easy to pronounce name from South Asia in Block E1
1	12	l	a	a	l	l	a	l	a	l	a	l	a	a	a	l	l	0.5	0.5	0.5	0.5	0.5	0.5	0.5	0.5		E1 Lubov Ershova	a = true, l = false; Judgement of statement paired with this Easy to pronounce name from East Europe in Block E1
2	13	a	l	l	l	a	l	a	a	a	l	l	l	l	a	l	a	0.5	0.25	0.75	0.25	0.625	0.25	0.375	0.5		E1 Bodo Wallmeyer	a = true, l = false; Judgement of statement paired with this Easy to pronounce name from West Europe in Block E1
3	14	a	l	l	l	l	l	l	a	l	l	l	a	a	a	a	l	0.75	0.25	0.25	0.25	0.5	0.25	0.5	0.25		E1 Marciano Larrosa	a = true, l = false; Judgement of statement paired with this Easy to pronounce name from West Europe in Block E1
4	15	l	a	a	l	l	l	a	l	a	a	a	l	l	l	a	l	0.75	0.25	0.5	0.25	0.625	0.25	0.5	0.375		E2 Chung Jung-hee	a = true, l = false; Judgement of statement paired with this Easy to pronounce name from East Asia in Block E2
1	16	a	a	a	a	a	l	l	a	l	a	l	a	l	l	a	a	0.5	0.5	1	0.5	0.75	0.5	0.5	0.75		E2 Andrian Babeshko	a = true, l = false; Judgement of statement paired with this Easy to pronounce name from East Europe in Block E2
1	17	a	l	l	a	l	l	l	a	a	a	a	l	l	l	a	l	0.75	0.25	0.5	0.25	0.625	0.25	0.5	0.375		E2 Bandula Premachandra	a = true, l = false; Judgement of statement paired with this Easy to pronounce name from South Asia in Block E2
2	18	a	a	l	l	a	a	l	l	a	l	a	l	l	a	a	l	0.5	0.5	0.5	0.5	0.5	0.5	0.5	0.5		E2 Chen Meina	a = true, l = false; Judgement of statement paired with this Easy to pronounce name from East Asia in Block E2
3	19	l	l	l	l	l	a	a	l	a	l	a	a	l	a	a	l	0.5	0.75	0.5	0	0.5	0.375	0.625	0.25		Easy name hits	Proportion of "True" responses across all True statements that were paired with Easy to pronounce names
4	20	a	a	a	a	a	l	a	l	l	l	l	a	a	a	a	a	0.25	1	1	0.5	0.625	0.75	0.625	0.75		Easy name false alarms	Proportion of "True" responses across all False statements that were paired with Easy to pronounce names
1	21	l	l	a	a	l	l	l	a	a	a	a	l	a	l	a	a	0.75	0.75	0.5	0.25	0.625	0.5	0.75	0.375		Difficult name hits	Proportion of "True" responses across all True statements that were paired with Difficult to pronounce names
2	22	l	a	l	l	a	a	a	l	a	l	a	l	a	a	l	a	0.75	0.5	0.75	0.25	0.75	0.375	0.625	0.5		Difficult name false alarms	Proportion of "True" responses across all False statements that were paired with Difficult to pronounce names
3	23	a	l	a	a	l	l	a	a	l	l	l	a	a	a	a	a	1	0.25	0.5	0.75	0.75	0.5	0.625	0.625		Overall hits	Proportion of "True" responses across all True statements (not split by which type of name they were paired with)
4	24	a	a	l	l	a	l	a	a	a	a	l	a	l	l	a	l	0.75	0.25	0.5	0.75	0.625	0.5	0.5	0.625		Overall false alarms	Proportion of "True" responses across all False statements (not split by which type of name they were paired with)
1	25	a	l	l	a	a	a	l	l	l	a	a	l	l	l	a	l	0.5	0.25	0.5	0.5	0.5	0.375	0.375	0.5		Overall easy names	Proportion of "True" responses across all statements paired with Easy names (not split by which type of statement they were paired with)
2	26	l	l	l	a	l	a	a	l	l	a	a	l	a	l	l	a	0.5	0.5	0.5	0.25	0.5	0.375	0.5	0.375		Overall difficult names	Proportion of "True" responses across all statements paired with Difficult names (not split by which type of statement they were paired with)
3	27	a	l	l	a	a	l	a	a	l	l	a	a	a	a	a	l	0.75	0.5	0.75	0.5	0.75	0.5	0.625	0.625
4	28	a	a	a	a	l	l	l	a	a	a	a	a	a	a	a	l	1	0.75	1	0.25	1	0.5	0.875	0.625			Notes on counterbalances (block of names, block (and type) of trivia statements those names were presented with in specified counterbalance)
1	29	l	l	l	a	a	l	l	l	a	a	a	a	l	l	l	l	1	0	0.25	0.25	0.625	0.125	0.5	0.25			CB1 = Block E1, true 1; Block E2, false 1; Block D1, true 2; Block D2, false 2
4	30	a	a	l	l	l	l	l	a	l	a	a	a	a	l	a	l	0.75	0.5	0.5	0.25	0.625	0.375	0.625	0.375			CB2 = Block E1, false 2; Block E2, true 2; Block D1, false 1; Block D2, true 1
1	31	l	l	a	a	a	a	l	l	l	l	a	l	a	a	a	l	0.25	0.75	0.5	0.5	0.375	0.625	0.5	0.5			CB3 = Block E1, false 1; Block E2, true 1; Block D1, false 2; Block D2, true 2
2	32	a	a	l	l	l	a	a	l	l	a	a	a	l	a	a	l	0.5	0.75	0.5	0.5	0.5	0.625	0.625	0.5			CB4 = Block E1, true 2; Block E2, false 2; Block D1, true 1; Block D2, false 1
3	33	l	a	a	a	a	l	l	a	a	l	a	l	a	a	a	a	1	0.5	0.5	0.75	0.75	0.625	0.75	0.625
4	34	l	a	a	a	a	a	a	a	a	a	a	a	a	l	a	a	1	0.75	0.75	1	0.875	0.875	0.875	0.875
1	35	a	a	a	a	a	l	l	l	a	a	l	a	a	a	l	l	0.75	0.5	1	0.25	0.875	0.375	0.625	0.625
2	36	l	a	a	l	a	l	a	a	a	l	l	l	l	a	a	a	0.75	0.25	0.75	0.5	0.75	0.375	0.5	0.625
4	37	a	a	a	l	l	l	l	a	a	l	l	a	l	a	l	a	0.5	0.5	0.75	0.25	0.625	0.375	0.5	0.5
2	38	l	l	a	l	a	l	a	l	l	a	a	a	a	l	l	l	0.25	0.75	0.5	0.25	0.375	0.5	0.5	0.375
4	39	a	l	a	a	a	l	a	a	l	l	a	a	l	l	l	l	0.5	0	0.75	0.75	0.625	0.375	0.25	0.75
2	40	l	a	l	l	l	l	l	l	l	a	l	l	a	l	l	l	0.25	0.25	0	0.25	0.125	0.25	0.25	0.125
3	41	a	l	l	l	l	l	a	a	l	l	a	l	a	l	a	a	0.75	0.25	0.5	0.25	0.625	0.25	0.5	0.375
1	42	l	a	l	a	l	l	a	l	a	a	a	l	l	l	l	l	0.75	0	0.5	0.25	0.625	0.125	0.375	0.375
2	43	l	a	a	l	a	a	l	a	a	l	l	a	a	a	l	a	0.75	0.5	0.75	0.5	0.75	0.5	0.625	0.625
3	44	l	l	a	a	a	l	a	a	l	l	a	l	a	l	a	l	0.5	0.25	0.75	0.5	0.625	0.375	0.375	0.625
1	45	l	a	l	a	l	l	a	a	a	l	a	l	a	l	a	a	0.5	0.75	0.5	0.5	0.5	0.625	0.625	0.5
3	46	l	l	a	a	l	l	a	a	l	l	a	a	l	l	a	l	0.25	0.5	0.5	0.5	0.375	0.5	0.375	0.5
1	47	l	l	a	l	a	l	a	a	a	a	a	l	a	l	a	l	0.75	0.5	0.25	0.75	0.5	0.625	0.625	0.5
3	48	l	l	l	a	a	l	l	l	l	a	l	a	a	a	l	a	0.75	0.5	0.25	0.25	0.5	0.375	0.625	0.25
2	49	a	a	a	l	l	l	a	l	l	l	a	a	a	a	a	a	1	0.5	0.25	0.75	0.625	0.625	0.75	0.5
4	50	l	a	l	l	a	l	a	l	l	a	a	l	a	l	a	l	0.5	0.5	0.25	0.5	0.375	0.5	0.5	0.375
2	51	a	l	l	l	a	a	a	l	a	l	l	a	l	a	l	a	0.5	0.5	0.75	0.25	0.625	0.375	0.5	0.5
4	52	l	l	l	l	l	l	a	l	l	l	l	l	a	l	l	l	0	0.25	0	0.25	0	0.25	0.125	0.125
1	53	a	l	a	l	l	l	l	a	a	a	a	a	a	l	a	a	1	0.75	0.5	0.25	0.75	0.5	0.875	0.375
2	54	l	a	a	l	l	a	a	l	a	l	l	l	a	l	a	a	0.75	0.25	0.5	0.5	0.625	0.375	0.5	0.5
3	55	a	a	l	a	a	a	l	a	a	a	l	l	a	a	l	l	0.5	0.5	0.75	0.75	0.625	0.625	0.5	0.75
4	56	a	l	a	l	l	a	a	a	l	l	l	a	a	l	a	a	0.25	0.75	0.5	0.75	0.375	0.75	0.5	0.625
1	57	l	l	a	l	a	l	l	l	l	a	a	a	l	l	l	l	0.75	0	0.25	0.25	0.5	0.125	0.375	0.25
2	58	l	a	a	a	a	l	a	l	l	l	l	a	l	l	l	l	0	0.25	0.5	0.75	0.25	0.5	0.125	0.625
3	59	a	a	l	l	a	l	a	a	l	a	a	a	l	a	l	a	0.5	0.75	0.75	0.5	0.625	0.625	0.625	0.625
4	60	a	a	a	l	l	a	a	a	a	l	a	a	a	l	a	a	0.75	0.75	0.75	0.75	0.75	0.75	0.75	0.75
2	61	l	a	l	l	a	l	l	a	l	a	a	a	l	a	a	a	0.75	0.75	0.5	0.25	0.625	0.5	0.75	0.375
1	62	l	l	a	a	a	l	l	a	a	a	a	a	l	l	l	l	1	0	0.5	0.5	0.75	0.25	0.5	0.5
3	63	a	l	l	a	a	l	l	l	a	a	l	l	a	a	l	a	0.75	0.5	0.25	0.5	0.5	0.5	0.625	0.375
1	64	l	a	l	l	a	a	a	l	a	l	l	l	l	a	a	a	0.25	0.75	0.25	0.75	0.25	0.75	0.5	0.5
3	65	l	l	a	l	l	l	a	l	l	l	l	l	l	l	l	a	0.25	0	0.25	0.25	0.25	0.125	0.125	0.25
1	66	l	l	a	a	a	l	a	l	a	a	a	l	l	l	l	l	0.75	0	0.5	0.5	0.625	0.25	0.375	0.5
4	67	a	l	a	l	l	a	a	l	a	l	l	a	l	a	a	a	0.5	0.75	0.5	0.5	0.5	0.625	0.625	0.5
2	68	a	a	l	a	a	a	l	a	l	a	l	a	a	a	l	a	0.75	0.5	0.75	0.75	0.75	0.625	0.625	0.75
4	69	l	l	a	a	l	a	a	l	a	a	l	l	a	l	l	l	0.5	0.25	0.5	0.5	0.5	0.375	0.375	0.5
3	70	l	l	l	a	a	a	a	a	a	l	a	l	a	a	a	l	0.75	0.5	1	0.25	0.875	0.375	0.625	0.625
3	71	a	a	a	a	l	a	l	l	l	l	l	a	l	l	a	a	0.5	0.25	0.25	1	0.375	0.625	0.375	0.625
4	72	l	l	a	l	l	l	l	l	a	l	l	a	a	a	l	l	0.5	0.5	0.25	0	0.375	0.25	0.5	0.125
2	73	l	l	a	a	a	a	l	l	l	l	l	l	a	l	a	a	0.75	0	0.5	0.5	0.625	0.25	0.375	0.5
3	74	a	l	a	a	l	a	a	a	a	a	a	a	a	l	l	l	0.25	1	0.75	0.75	0.5	0.875	0.625	0.75
4	75	a	a	l	l	a	l	a	l	a	l	l	a	a	l	a	a	0.5	0.75	0.5	0.5	0.5	0.625	0.625	0.5
1	76	a	l	l	a	l	l	l	l	a	a	a	l	l	l	a	a	0.75	0.5	0.5	0	0.625	0.25	0.625	0.25
2	77	l	l	a	l	a	a	l	l	a	l	a	l	a	a	a	a	1	0.5	0.5	0.25	0.75	0.375	0.75	0.375
3	78	l	a	a	l	a	a	l	a	a	l	l	l	a	a	l	l	0.5	0.25	0.75	0.5	0.625	0.375	0.375	0.625
4	79	l	a	a	l	l	a	l	a	l	l	a	a	a	l	l	l	0.5	0.25	0.5	0.5	0.5	0.375	0.375	0.5
1	80	l	l	a	a	a	l	a	a	l	a	l	a	l	a	l	a	0.5	0.5	0.5	0.75	0.5	0.625	0.5	0.625
2	81	a	l	a	l	l	a	l	l	a	l	a	l	a	a	l	a	0.75	0.5	0.25	0.5	0.5	0.5	0.625	0.375
4	82	a	l	l	a	a	l	l	l	a	l	a	a	l	a	l	l	0.75	0.25	0.5	0.25	0.625	0.25	0.5	0.375
1	83	a	a	a	a	l	a	l	a	a	a	a	l	a	l	l	l	0.75	0.25	1	0.5	0.875	0.375	0.5	0.75
2	84	l	l	a	l	a	l	l	l	a	l	a	l	l	a	a	a	0.75	0.5	0.25	0.25	0.5	0.375	0.625	0.25
3	85	l	a	l	l	l	a	l	l	l	l	l	a	l	l	a	l	0.25	0.25	0.25	0.25	0.25	0.25	0.25	0.25
3	86	a	a	a	a	l	l	a	a	a	a	a	a	a	l	a	l	0.5	1	0.5	1	0.5	1	0.75	0.75
4	87	a	l	a	a	l	a	a	a	a	a	l	a	a	a	a	l	0.75	0.75	0.75	0.75	0.75	0.75	0.75	0.75
1	88	a	l	l	l	a	l	a	l	a	l	l	l	a	a	a	a	0.25	1	0.25	0.5	0.25	0.75	0.625	0.375
2	89	l	l	a	l	a	a	a	a	a	l	l	a	a	l	a	a	0.75	0.5	1	0.25	0.875	0.375	0.625	0.625
3	90	l	l	l	a	a	a	l	l	a	a	a	a	a	a	a	l	0.75	1	0.5	0.25	0.625	0.625	0.875	0.375
4	91	a	a	l	a	a	a	l	l	a	a	l	a	a	a	a	a	0.75	1	0.75	0.5	0.75	0.75	0.875	0.625
1	92	a	l	a	l	a	l	a	l	a	a	a	a	a	l	l	l	1	0.25	0.5	0.5	0.75	0.375	0.625	0.5
2	93	l	a	l	l	a	a	l	l	l	a	l	a	l	a	l	l	0.25	0.5	0.5	0.25	0.375	0.375	0.375	0.375
3	94	l	l	l	a	a	a	l	a	a	l	l	a	a	a	a	a	1	0.5	0.75	0.25	0.875	0.375	0.75	0.5
4	95	a	a	l	l	l	a	l	l	l	a	l	a	a	l	a	l	0.5	0.5	0.5	0.25	0.5	0.375	0.5	0.375
1	96	a	l	a	a	l	l	l	a	a	l	a	a	a	a	l	a	0.75	0.75	0.75	0.25	0.75	0.5	0.75	0.5
2	97	a	l	l	a	l	a	l	a	l	l	a	a	a	a	a	l	0.75	0.5	0.5	0.5	0.625	0.5	0.625	0.5
3	98	l	a	a	a	a	l	a	a	a	a	a	l	a	l	l	a	0.5	0.75	0.75	0.75	0.625	0.75	0.625	0.75
4	99	l	a	l	l	l	l	l	l	l	l	l	l	a	a	a	a	0	1	0.25	0	0.125	0.5	0.5	0.125
1	100	l	a	l	a	a	l	l	a	a	a	a	a	a	a	a	a	1	1	0.5	0.5	0.75	0.75	1	0.5
2	101	l	a	a	l	l	l	l	l	a	a	a	l	a	l	l	a	0.5	0.75	0	0.5	0.25	0.625	0.625	0.25
3	102	a	a	a	l	a	l	a	a	a	a	a	a	a	l	l	a	0.5	1	0.75	0.75	0.625	0.875	0.75	0.75
4	103	l	a	a	a	a	l	l	l	a	l	a	a	l	l	l	a	0.75	0.25	0.75	0.25	0.75	0.25	0.5	0.5
1	104	a	a	l	a	a	a	l	a	a	a	l	l	l	a	l	l	0.5	0.25	0.75	0.75	0.625	0.5	0.375	0.75
1	105	l	l	l	l	a	l	l	a	a	a	l	a	l	l	a	l	0.75	0.25	0	0.5	0.375	0.375	0.5	0.25
